# Supplementary material for: Identifying symptomatic adverse events using the patient‐reported outcomes version of the common terminology criteria for adverse events in patients with non‐small cell lung cancer with epidermal growth factor receptor exon 20 insertion mutations
Source: PubMed Central journal article supplement (PMC10028096; doi:10.1002/cam4.5376), 2022-12-30

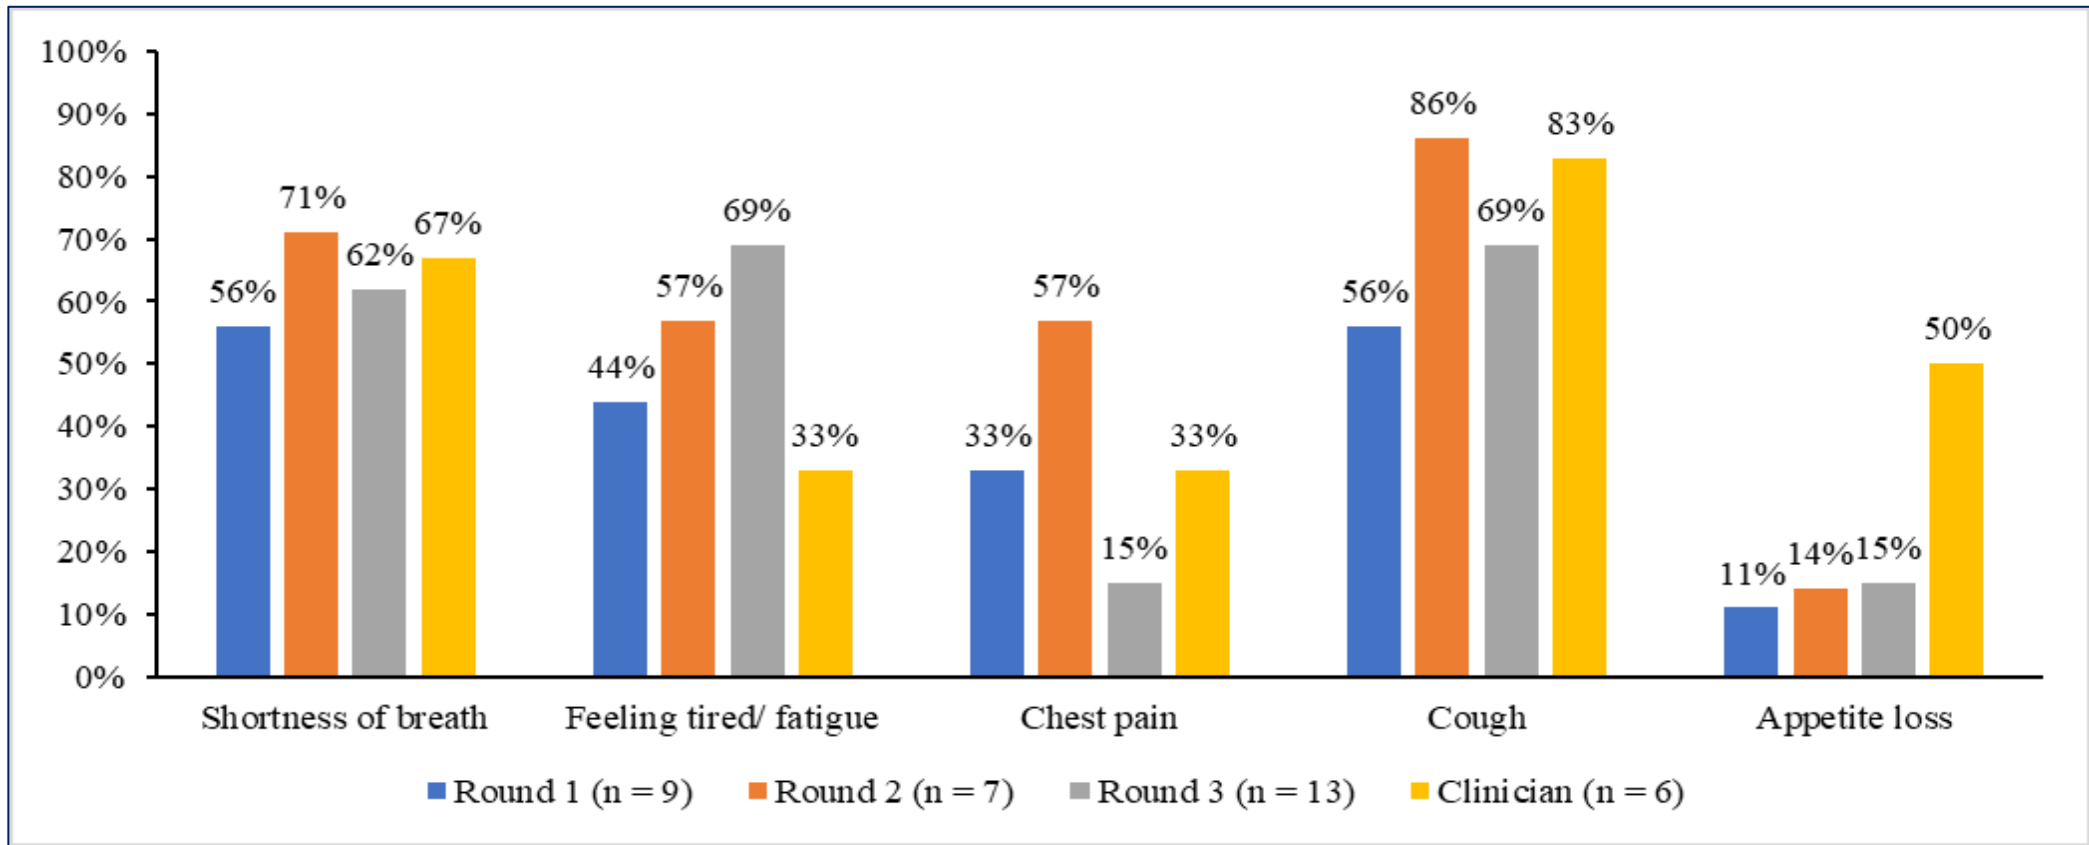

Supplement: CAM4-12-5494-s001.pdf [file CAM4-12-5494-s001.pdf]
